# Supplementary material for: Classification and Interactions of LRR Receptors and Co-receptors Within the Arabidopsis Plasma Membrane – An Overview
Source: Front Plant Sci. 2019 Apr 16;10:472. doi: 10.3389/fpls.2019.00472 (PMC6477698; doi:10.3389/fpls.2019.00472)
Supplement: TABLE S1 — List of LRR-RKs used in this work. [file Table_1.XLSX]

## Sheet: ST_1_LRR-RKs List
AGI	Gene Symbol	subclade	Evolutional monophyletic clades (Zulawski. et.al 2014)	annotation based on phylogeny	ECD size THMM Server v. 2.0	length	Family cluster	BINCODE	Mapman	DESCRIPTION	TYPE	bin1	bin_ short	suba3	suba3 short
AT4G22730	AT4G22730	receptor kinases	LRR_clade_3	LRR IV	311	688	co-receptor	30.2.4	signalling.receptor kinases.leucine rich repeat IV	leucine-rich repeat transmembrane protein kinase, putative | chr4:11941131-11943885 FORWARD	T	30	30.2	plasma membrane	PM
AT5G51560	AT5G51560	receptor kinases	LRR_clade_3	LRR IV	306	680	co-receptor	30.2.4	signalling.receptor kinases.leucine rich repeat IV	leucine-rich repeat transmembrane protein kinase, putative | chr5:20945685-20948854 FORWARD	T	30	30.2	plasma membrane	PM
AT2G45340	AT2G45340	receptor kinases	LRR_clade_3	LRR IV	312	691	co-receptor	30.2.4	signalling.receptor kinases.leucine rich repeat IV	leucine-rich repeat transmembrane protein kinase, putative | chr2:18691722-18694725 FORWARD	T	30	30.2	plasma membrane	PM
AT1G11130	SUB	receptor kinases	LRR_5	LRR V	341	768	co-receptor	30.2.5	signalling.receptor kinases.leucine rich repeat V	Symbols: SUB, SCM, SRF9 | SUB (STRUBBELIG); protein binding / receptor signaling protein serine/threonine kinase | chr1:3722857-3727450 FORWARD	T	30	30.2	plasma membrane	PM
AT4G03390	SRF3	receptor kinases	LRR_5	LRR V	316	776	co-receptor	30.2.5	signalling.receptor kinases.leucine rich repeat V	Symbols: SRF3 | SRF3 (STRUBBELIG-RECEPTOR FAMILY 3); ATP binding / kinase/ protein serine/threonine kinase | chr4:1490465-1495103 REVERSE	T	30	30.2	plasma membrane	PM
AT2G20850	SRF1	receptor kinases	LRR_5	LRR V	314	775	co-receptor	30.2.5	signalling.receptor kinases.leucine rich repeat V	Symbols: SRF1 | SRF1 (strubbelig receptor family 1); kinase | chr2:8975348-8979379 REVERSE	T	30	30.2	plasma membrane	PM
AT4G22130	SRF8	receptor kinases	LRR_5	LRR V	287	703	co-receptor	30.2.5	signalling.receptor kinases.leucine rich repeat V	Symbols: SRF8 | SRF8 (STRUBBELIG-RECEPTOR FAMILY 8); ATP binding / kinase/ protein binding / protein kinase/ protein serine/threonine kinase/ protein tyrosine kinase | chr4:11723513-11727673 FORWARD	T	30	30.2	plasma membrane	PM
AT1G78980	SRF5	receptor kinases	LRR_5	LRR V	272	699	co-receptor	30.2.5	signalling.receptor kinases.leucine rich repeat V	Symbols: SRF5 | SRF5 (STRUBBELIG-RECEPTOR FAMILY 5); ATP binding / kinase/ protein serine/threonine kinase | chr1:29707687-29711421 REVERSE	T	30	30.2	plasma membrane	PM
AT3G13065	SRF4	receptor kinases	LRR_5	LRR V	276	687	co-receptor	30.2.5	signalling.receptor kinases.leucine rich repeat V	Symbols: SRF4 | SRF4 (STRUBBELIG-RECEPTOR FAMILY 4); ATP binding / kinase/ protein serine/threonine kinase | chr3:4187371-4191298 FORWARD	T	30	30.2	plasma membrane	PM
AT3G14350	SRF7	receptor kinases	LRR_5	LRR V	289	717	co-receptor	30.2.5	signalling.receptor kinases.leucine rich repeat V	Symbols: SRF7 | SRF7 (STRUBBELIG-RECEPTOR FAMILY 7); ATP binding / protein binding / protein kinase/ protein serine/threonine kinase/ protein tyrosine kinase | chr3:4782757-4787236 REVERSE	T	30	30.2	plasma membrane	PM
AT1G53730	SRF6	receptor kinases	LRR_5	LRR V	288	719	co-receptor	30.2.5	signalling.receptor kinases.leucine rich repeat V	Symbols: SRF6 | SRF6 (STRUBBELIG-RECEPTOR FAMILY 6); ATP binding / protein binding / protein kinase/ protein serine/threonine kinase | chr1:20061701-20065713 FORWARD	T	30	30.2	plasma membrane	PM
AT5G06820	SRF2	receptor kinases	LRR_5	LRR V	293	735	co-receptor	30.2.5	signalling.receptor kinases.leucine rich repeat V	Symbols: SRF2 | SRF2 (STRUBBELIG-RECEPTOR FAMILY 2); ATP binding / kinase/ protein serine/threonine kinase | chr5:2112869-2116754 FORWARD	T	30	30.2	plasma membrane	PM
AT2G31880	SOBIR1	receptor kinases	LRR_11	LRR XI	283	641	co-receptor	30.2.11	signalling.receptor kinases.leucine rich repeat XI	leucine-rich repeat transmembrane protein kinase, putative | chr2:13554894-13556977 FORWARD	T	30	30.2	plasma membrane	PM
AT1G31420	FEI1	receptor kinases	LRR_11	LRR XI	239	592	co-receptor	30.2.13	signalling.receptor kinases.leucine rich repeat XIII	Symbols: FEI1 | FEI1 (FEI 1); ATP binding / kinase/ protein serine/threonine kinase | chr1:11249618-11253879 FORWARD	T	30	30.2	plasma membrane	PM
AT2G35620	FEI2	receptor kinases	LRR_11	LRR XI	237	589	co-receptor	30.2.13	signalling.receptor kinases.leucine rich repeat XIII	Symbols: FEI2 | FEI2 (FEI 2); kinase | chr2:14960940-14965359 REVERSE	T	30	30.2	plasma membrane	PM
AT5G62710	AT5G62710	receptor kinases	LRR_11	LRR XI**	240	604	co-receptor	30.2.13	signalling.receptor kinases.leucine rich repeat XIII	leucine-rich repeat family protein / protein kinase family protein | chr5:25187303-25190600 FORWARD	T	30	30.2	plasma membrane	PM
AT5G48380	BIR1	receptor kinases	LRR_clade_4	LRR X	226	620	co-receptor	30.2.10	signalling.receptor kinases.leucine rich repeat X	leucine-rich repeat family protein / protein kinase family protein | chr5:19604089-19607059 REVERSE	T	30	30.2	plasma membrane	PM
AT3G28450	BIR2	receptor kinases	LRR_clade_4	LRR X	229	605	co-receptor	30.2.10	signalling.receptor kinases.leucine rich repeat X	leucine-rich repeat transmembrane protein kinase, putative | chr3:10667262-10669377 FORWARD	T	30	30.2	plasma membrane	PM
AT1G69990	BIR4	receptor kinases	LRR_clade_4	LRR X	215	591	co-receptor	30.2.10	signalling.receptor kinases.leucine rich repeat X	leucine-rich repeat transmembrane protein kinase, putative | chr1:26360235-26362010 REVERSE	T	30	30.2	plasma membrane	PM
AT1G27190	BIR3	receptor kinases	LRR_clade_4	LRR X	223	601	co-receptor	30.2.10	signalling.receptor kinases.leucine rich repeat X	leucine-rich repeat transmembrane protein kinase, putative | chr1:9446657-9448825 REVERSE	T	30	30.2	plasma membrane	PM
AT5G45800	MEE62	receptor kinases	LRR_clade_4	LRR X	297	666	co-receptor	30.2.7	signalling.receptor kinases.leucine rich repeat VII	Symbols: MEE62 | MEE62 (maternal effect embryo arrest 62); ATP binding / protein binding / protein kinase/ protein serine/threonine kinase/ protein tyrosine kinase | chr5:18575536-18579107 REVERSE	T	30	30.2	plasma membrane	PM
AT1G69270	RPK1	receptor kinases	LRR_clade_4	LRR VIIA*	198	540	co-receptor	30.2.99	signalling.receptor kinases.misc	Symbols: RPK1 | RPK1 (RECEPTOR-LIKE PROTEIN KINASE 1); kinase/ protein binding / receptor signaling protein serine/threonine kinase | chr1:26040689-26042702 REVERSE	T	30	30.2	plasma membrane	PM
AT3G24660	TMKL1	receptor kinases	LRR_clade_4	LRR III	300	674	co-receptor	30.2.3	signalling.receptor kinases.leucine rich repeat III	Symbols: TMKL1 | TMKL1 (transmembrane kinase-like 1); ATP binding / kinase/ protein serine/threonine kinase | chr3:9003576-9005943 FORWARD	T	30	30.2	plasma membrane	PM
AT5G67280	RLK	receptor kinases	LRR_clade_4	LRR III	337	751	co-receptor	30.2.3	signalling.receptor kinases.leucine rich repeat III	Symbols: RLK | RLK (Receptor-like kinase); ATP binding / kinase/ protein serine/threonine kinase | chr5:26842270-26845190 REVERSE	T	30	30.2	plasma membrane	PM
AT2G23300	AT2G23300	receptor kinases	LRR_clade_4	LRR III	333	773	co-receptor	30.2.3	signalling.receptor kinases.leucine rich repeat III	leucine-rich repeat transmembrane protein kinase, putative | chr2:9914608-9917130 FORWARD	T	30	30.2	plasma membrane	PM
AT4G37250	AT4G37250	receptor kinases	LRR_clade_4	LRR III	329	768	co-receptor	30.2.3	signalling.receptor kinases.leucine rich repeat III	leucine-rich repeat family protein / protein kinase family protein | chr4:17527650-17530506 REVERSE	T	30	30.2	plasma membrane	PM
AT2G15300	AT2G15300	receptor kinases	LRR_clade_4	LRR III	335	744	co-receptor	30.2.3	signalling.receptor kinases.leucine rich repeat III	leucine-rich repeat transmembrane protein kinase, putative | chr2:6649630-6652010 FORWARD	T	30	30.2	plasma membrane	PM
AT4G34220	AT4G34220	receptor kinases	LRR_clade_4	LRR III	338	757	co-receptor	30.2.3	signalling.receptor kinases.leucine rich repeat III	leucine-rich repeat transmembrane protein kinase, putative | chr4:16381506-16384194 REVERSE	T	30	30.2	plasma membrane	PM
AT1G67510	AT1G67510	receptor kinases	LRR_clade_4	LRR III	314	719	co-receptor	30.2.3	signalling.receptor kinases.leucine rich repeat III	leucine-rich repeat family protein | chr1:25297477-25300184 REVERSE	T	30	30.2	plasma membrane	PM
AT2G42290	AT2G42290	receptor kinases	LRR_clade_4	LRR III	275	646	co-receptor	30.2.3	signalling.receptor kinases.leucine rich repeat III	leucine-rich repeat family protein | chr2:17616841-17619593 REVERSE	T	30	30.2	plasma membrane	PM
AT3G57830	AT3G57830	receptor kinases	LRR_clade_4	LRR III	276	662	co-receptor	30.2.3	signalling.receptor kinases.leucine rich repeat III	leucine-rich repeat transmembrane protein kinase, putative | chr3:21419517-21422546 FORWARD	T	30	30.2	plasma membrane	PM
AT1G66830	AT1G66830	receptor kinases	LRR_clade_4	LRR III	303	685	co-receptor	30.2.3	signalling.receptor kinases.leucine rich repeat III	leucine-rich repeat transmembrane protein kinase, putative | chr1:24930665-24932918 REVERSE	T	30	30.2	plasma membrane	PM
AT1G25320	AT1G25320	receptor kinases	LRR_clade_4	LRR III	315	702	co-receptor	30.2.3	signalling.receptor kinases.leucine rich repeat III	leucine-rich repeat transmembrane protein kinase, putative | chr1:8877857-8880310 FORWARD	T	30	30.2	plasma membrane	PM
AT2G01210	AT2G01210	receptor kinases	LRR_clade_4	LRR III	318	716	co-receptor	30.2.3	signalling.receptor kinases.leucine rich repeat III	leucine-rich repeat transmembrane protein kinase, putative | chr2:119441-121846 REVERSE	T	30	30.2	plasma membrane	PM
AT1G48480	RKL1	receptor kinases	LRR_clade_4	LRR III	267	655	co-receptor	30.2.3	signalling.receptor kinases.leucine rich repeat III	Symbols: RKL1 | RKL1; ATP binding / kinase/ protein serine/threonine kinase | chr1:17918391-17920985 FORWARD	T	30	30.2	plasma membrane	PM
AT3G17840	RLK902	receptor kinases	LRR_clade_4	LRR III	265	647	co-receptor	30.2.3	signalling.receptor kinases.leucine rich repeat III	Symbols: RLK902 | RLK902; ATP binding / kinase/ protein serine/threonine kinase | chr3:6106028-6108675 FORWARD	T	30	30.2	plasma membrane	PM
AT5G16590	LRR1/QSK2	receptor kinases	LRR_clade_4	LRR III	243	625	co-receptor	30.2.3	signalling.receptor kinases.leucine rich repeat III	Symbols: LRR1 | LRR1; ATP binding / kinase/ protein serine/threonine kinase | chr5:5431681-5434134 FORWARD	T	30	30.2	plasma membrane	PM
AT3G02880	KIN7/QSK1	receptor kinases	LRR_clade_4	LRR III	252	627	co-receptor	30.2.3	signalling.receptor kinases.leucine rich repeat III	leucine-rich repeat transmembrane protein kinase, putative | chr3:634653-637284 FORWARD	T	30	30.2	plasma membrane	PM
AT5G05160	RUL1	receptor kinases	LRR_clade_4	LRR III	264	640	co-receptor	30.2.3	signalling.receptor kinases.leucine rich repeat III	leucine-rich repeat transmembrane protein kinase, putative | chr5:1527975-1530062 FORWARD	T	30	30.2	extracellular,plasma membrane	EX,PM
AT2G26730	AT2G26730	receptor kinases	LRR_clade_4	LRR III	258	658	co-receptor	30.2.3	signalling.receptor kinases.leucine rich repeat III	leucine-rich repeat transmembrane protein kinase, putative | chr2:11388407-11391641 FORWARD	T	30	30.2	plasma membrane	PM
AT4G23740	AT4G23740	receptor kinases	LRR_clade_4	LRR III	256	638	co-receptor	30.2.3	signalling.receptor kinases.leucine rich repeat III	leucine-rich repeat transmembrane protein kinase, putative | chr4:12366386-12369338 FORWARD	T	30	30.2	plasma membrane	PM
AT1G64210	AT1G64210	receptor kinases	LRR_clade_4	LRR III	230	587	co-receptor	30.2.3	signalling.receptor kinases.leucine rich repeat III	leucine-rich repeat transmembrane protein kinase, putative | chr1:23831033-23832863 FORWARD	T	30	30.2	plasma membrane	PM
AT5G24100	AT5G24100	receptor kinases	LRR_clade_4	LRR III	250	614	co-receptor	30.2.3	signalling.receptor kinases.leucine rich repeat III	leucine-rich repeat transmembrane protein kinase, putative | chr5:8148616-8151308 FORWARD	T	30	30.2	plasma membrane	PM
AT5G53320	AT5G53320	receptor kinases	LRR_clade_4	LRR III	234	601	co-receptor	30.2.3	signalling.receptor kinases.leucine rich repeat III	leucine-rich repeat transmembrane protein kinase, putative | chr5:21636241-21638398 REVERSE	T	30	30.2	plasma membrane	PM
AT3G08680	AT3G08680	receptor kinases	LRR_clade_4	LRR III	259	640	co-receptor	30.2.3	signalling.receptor kinases.leucine rich repeat III	leucine-rich repeat transmembrane protein kinase, putative | chr3:2637592-2640838 FORWARD	T	30	30.2	plasma membrane	PM
AT5G58300	AT5G58300	receptor kinases	LRR_clade_4	LRR III	282	654	co-receptor	30.2.3	signalling.receptor kinases.leucine rich repeat III	leucine-rich repeat transmembrane protein kinase, putative | chr5:23571879-23575084 FORWARD	T	30	30.2	plasma membrane	PM
AT1G10850	AT1G10850	receptor kinases	LRR_clade_4	LRR III	255	663	co-receptor	30.2.3	signalling.receptor kinases.leucine rich repeat III	ATP binding / protein binding / protein kinase/ protein serine/threonine kinase | chr1:3611747-3614613 FORWARD	T	30	30.2	plasma membrane	PM
AT1G60630	AT1G60630	receptor kinases	LRR_clade_4	LRR III	253	652	co-receptor	30.2.3	signalling.receptor kinases.leucine rich repeat III	leucine-rich repeat family protein | chr1:22334662-22336908 REVERSE	T	30	30.2	plasma membrane	PM
AT5G67200	AT5G67200	receptor kinases	LRR_clade_4	LRR III	284	669	co-receptor	30.2.3	signalling.receptor kinases.leucine rich repeat III	leucine-rich repeat transmembrane protein kinase, putative | chr5:26813725-26816566 REVERSE	T	30	30.2	plasma membrane	PM
AT3G50230	AT3G50230	receptor kinases	LRR_clade_4	LRR III	294	660	co-receptor	30.2.3	signalling.receptor kinases.leucine rich repeat III	leucine-rich repeat transmembrane protein kinase, putative | chr3:18620599-18623200 FORWARD	T	30	30.2	plasma membrane	PM
AT5G43020	AT5G43020	receptor kinases	LRR_clade_4	LRR III	281	669	co-receptor	30.2.3	signalling.receptor kinases.leucine rich repeat III	leucine-rich repeat transmembrane protein kinase, putative | chr5:17255291-17257742 REVERSE	T	30	30.2	plasma membrane	PM
AT4G31250	PRK7	receptor kinases	LRR_clade_4	LRR III	246	676	co-receptor	30.2.3	signalling.receptor kinases.leucine rich repeat III	leucine-rich repeat transmembrane protein kinase, putative | chr4:15178925-15181751 REVERSE	T	30	30.2	plasma membrane	PM
AT2G07040	PRK2A	receptor kinases	LRR_clade_4	LRR III	244	647	co-receptor	30.2.3	signalling.receptor kinases.leucine rich repeat III	Symbols: ATPRK2A, PRK2A | PRK2A; ATP binding / protein binding / protein kinase/ protein serine/threonine kinase/ protein tyrosine kinase | chr2:2916538-2918942 FORWARD	T	30	30.2	plasma membrane	PM
AT5G35390	PRK1	receptor kinases	LRR_clade_4	LRR III	256	662	co-receptor	30.2.3	signalling.receptor kinases.leucine rich repeat III	leucine-rich repeat transmembrane protein kinase, putative | chr5:13596918-13598976 FORWARD	T	30	30.2	plasma membrane	PM
AT1G50610	PRK5	receptor kinases	LRR_clade_4	LRR III	281	686	co-receptor	30.2.3	signalling.receptor kinases.leucine rich repeat III	leucine-rich repeat transmembrane protein kinase, putative | chr1:18742135-18744725 FORWARD	T	30	30.2	plasma membrane	PM
AT3G20190	PRK4	receptor kinases	LRR_clade_4	LRR III	279	679	co-receptor	30.2.3	signalling.receptor kinases.leucine rich repeat III	leucine-rich repeat transmembrane protein kinase, putative | chr3:7044943-7047390 FORWARD	T	30	30.2	plasma membrane	PM
AT5G20690	PRK6	receptor kinases	LRR_clade_4	LRR III	264	659	co-receptor	30.2.3	signalling.receptor kinases.leucine rich repeat III	ATP binding / kinase/ protein serine/threonine kinase | chr5:7002453-7004551 FORWARD	T	30	30.2	plasma membrane	PM
AT3G42880	PRK3	receptor kinases	LRR_clade_4	LRR III	250	633	co-receptor	30.2.3	signalling.receptor kinases.leucine rich repeat III	leucine-rich repeat transmembrane protein kinase, putative | chr3:14954587-14956577 FORWARD	T	30	30.2	plasma membrane	PM
AT1G72460	PRK8	receptor kinases	LRR_clade_4	LRR III	252	644	co-receptor	30.2.3	signalling.receptor kinases.leucine rich repeat III	leucine-rich repeat transmembrane protein kinase, putative | chr1:27279510-27281533 FORWARD	T	30	30.2	plasma membrane	PM
AT2G36570	PXC1	receptor kinases	LRR_clade_4	LRR III	269	672	co-receptor	30.2.3	signalling.receptor kinases.leucine rich repeat III	leucine-rich repeat transmembrane protein kinase, putative | chr2:15335496-15337927 FORWARD	T	30	30.2	plasma membrane	PM
AT5G39390	AT5G39390	receptor kinases	LRR_12	LRR XII	167	502	co-receptor	30.2.12	signalling.receptor kinases.leucine rich repeat XII	leucine-rich repeat family protein / protein kinase family protein | chr5:15763715-15765469 REVERSE	T	30	30.2	plasma membrane	PM
AT1G60800	NIK3/CIK1	receptor kinases	LRR_2	LRR II	238	632	co-receptor	30.2.2	signalling.receptor kinases.leucine rich repeat II	Symbols: NIK3 | NIK3 (NSP-INTERACTING KINASE 3); kinase | chr1:22383453-22387457 REVERSE	T	30	30.2	plasma membrane	PM
AT4G30520	SARK/CIK3	receptor kinases	LRR_2	LRR II	239	648	co-receptor	30.2.2	signalling.receptor kinases.leucine rich repeat II	leucine-rich repeat family protein / protein kinase family protein | chr4:14908000-14911307 REVERSE	T	30	30.2	plasma membrane	PM
AT2G23950	CIK2	receptor kinases	LRR_2	LRR II	234	634	co-receptor	30.2.2	signalling.receptor kinases.leucine rich repeat II	leucine-rich repeat family protein / protein kinase family protein | chr2:10187043-10190412 REVERSE	T	30	30.2	plasma membrane	PM
AT3G25560	NIK2	receptor kinases	LRR_2	LRR II	248	635	co-receptor	30.2.2	signalling.receptor kinases.leucine rich repeat II	Symbols: NIK2 | NIK2 (NSP-INTERACTING KINASE 2); ATP binding / protein binding / protein kinase/ protein serine/threonine kinase | chr3:9279513-9282688 REVERSE	T	30	30.2	plasma membrane	PM
AT5G16000	NIK1	receptor kinases	LRR_2	LRR II	248	638	co-receptor	30.2.2	signalling.receptor kinases.leucine rich repeat II	Symbols: NIK1 | NIK1 (NSP-INTERACTING KINASE 1); kinase | chr5:5224143-5227288 FORWARD	T	30	30.2	plasma membrane	PM
AT5G63710	APEX	receptor kinases	LRR_2	LRR II	224	614	co-receptor	30.2.2	signalling.receptor kinases.leucine rich repeat II	leucine-rich repeat transmembrane protein kinase, putative | chr5:25499414-25502798 FORWARD	T	30	30.2	plasma membrane	PM
AT5G10290	AT5G10290	receptor kinases	LRR_2	LRR II	223	613	co-receptor	30.2.2	signalling.receptor kinases.leucine rich repeat II	leucine-rich repeat family protein / protein kinase family protein | chr5:3235295-3238719 REVERSE	T	30	30.2	plasma membrane	PM
AT5G65240	AT5G65240	receptor kinases	LRR_2	LRR II	217	607	co-receptor	30.2.2	signalling.receptor kinases.leucine rich repeat II	kinase | chr5:26074730-26078254 REVERSE	T	30	30.2	plasma membrane	PM
AT2G13800	SERK5	receptor kinases	LRR_2	LRR II	213	601	co-receptor	30.2.2	signalling.receptor kinases.leucine rich repeat II	Symbols: ATSERK5, SERK5 | SERK5 (SOMATIC EMBRYOGENESIS RECEPTOR-LIKE KINASE 5); ATP binding / protein kinase/ transmembrane receptor protein serine/threonine kinase | chr2:5753271-5757239 FORWARD	T	30	30.2	plasma membrane	PM
AT2G13790	SERK4	receptor kinases	LRR_2	LRR II	231	620	co-receptor	30.2.2	signalling.receptor kinases.leucine rich repeat II	Symbols: ATSERK4, SERK4, BKK1 | SERK4 (SOMATIC EMBRYOGENESIS RECEPTOR-LIKE KINASE 4); protein binding / protein kinase/ transmembrane receptor protein serine/threonine kinase | chr2:5741820-5746793 FORWARD	T	30	30.2	plasma membrane	PM
AT4G33430	SERK3/BAK1	receptor kinases	LRR_2	LRR II	226	615	co-receptor	17.3.2.99	hormone metabolism.brassinosteroid.signal transduction.other	Symbols: BAK1, RKS10, SERK3, ELG, ATSERK3, ATBAK1 | BAK1 (BRI1-ASSOCIATED RECEPTOR KINASE); kinase/ protein binding / protein heterodimerization/ protein serine/threonine kinase | chr4:16086402-16090771 REVERSE	T	17	17.3	plasma membrane	PM
AT1G71830	SERK1	receptor kinases	LRR_2	LRR II	239	625	co-receptor	30.2.2	signalling.receptor kinases.leucine rich repeat II	Symbols: SERK1, ATSERK1 | SERK1 (SOMATIC EMBRYOGENESIS RECEPTOR-LIKE KINASE 1); kinase/ transmembrane receptor protein serine/threonine kinase | chr1:27018158-27022117 FORWARD	T	30	30.2	plasma membrane	PM
AT1G34210	SERK2	receptor kinases	LRR_2	LRR II	241	628	co-receptor	30.2.2	signalling.receptor kinases.leucine rich repeat II	Symbols: SERK2, ATSERK2 | SERK2 (SOMATIC EMBRYOGENESIS RECEPTOR-LIKE KINASE 2); kinase | chr1:12458670-12462905 FORWARD	T	30	30.2	plasma membrane	PM
AT5G45780	CIK4	receptor kinases	LRR_2	LRR II	238	614	co-receptor	30.2.2	signalling.receptor kinases.leucine rich repeat II	leucine-rich repeat transmembrane protein kinase, putative | chr5:18566812-18569625 REVERSE	T	30	30.2	plasma membrane	PM
AT3G19300	AT3G19300	receptor kinases	LRR_clade_2	LRR IXA*	252	663	co-receptor	30.2.99	signalling.receptor kinases.misc	protein kinase family protein | chr3:6690118-6693284 REVERSE	T	30	30.2	plasma membrane	PM
AT1G49730	AT1G49730	receptor kinases	LRR_clade_2	LRR IXA*	282	693	co-receptor	30.2.99	signalling.receptor kinases.misc	protein kinase family protein | chr1:18402506-18405681 REVERSE	T	30	30.2	plasma membrane	PM
AT1G51810	AT1G51810	receptor kinases	LRR_clade_1	LRR I*	383	744	co-receptor	30.2.99	signalling.receptor kinases.misc	ATP binding / kinase/ protein binding / protein kinase/ protein serine/threonine kinase | chr1:19227119-19232359 REVERSE	T	30	30.2	plasma membrane	PM
AT1G51830	SIF1	receptor kinases	LRR_clade_1	LRR I*	315	693	co-receptor	30.2.99	signalling.receptor kinases.misc	ATP binding / kinase/ protein serine/threonine kinase | chr1:19243025-19246010 REVERSE	T	30	30.2	plasma membrane	PM
AT5G48740	AT5G48740	receptor kinases	LRR_clade_1	LRR I	265	895	co-receptor	30.2.1	signalling.receptor kinases.leucine rich repeat I	leucine-rich repeat family protein / protein kinase family protein | chr5:19765195-19769369 REVERSE	T	30	30.2	plasma membrane	PM
AT5G63410	AT5G63410	receptor kinases	LRR_clade_1	LRR VIA**	315	680	co-receptor	30.2.6	signalling.receptor kinases.leucine rich repeat VI	leucine-rich repeat transmembrane protein kinase, putative | chr5:25394984-25398153 REVERSE	T	30	30.2	plasma membrane	PM
AT5G14210	AT5G14210	receptor kinases	LRR_clade_1	LRR VIA**	397	775	co-receptor	30.2.6	signalling.receptor kinases.leucine rich repeat VI	leucine-rich repeat transmembrane protein kinase, putative | chr5:4578378-4581374 REVERSE	T	30	30.2	plasma membrane	PM
AT3G03770	AT3G03770	receptor kinases	LRR_clade_1	LRR VIA**	389	802	co-receptor	30.2.6	signalling.receptor kinases.leucine rich repeat VI	leucine-rich repeat transmembrane protein kinase, putative | chr3:945135-949038 REVERSE	T	30	30.2	plasma membrane	PM
AT2G02780	AT2G02780	receptor kinases	LRR_clade_1	LRR VIA**	351	742	co-receptor	30.2.6	signalling.receptor kinases.leucine rich repeat VI	leucine-rich repeat transmembrane protein kinase, putative | chr2:781847-784646 REVERSE	T	30	30.2	plasma membrane	PM
AT1G14390	AT1G14390	receptor kinases	LRR_clade_1	LRR VIA**	354	747	co-receptor	30.2.6	signalling.receptor kinases.leucine rich repeat VI	leucine-rich repeat transmembrane protein kinase, putative | chr1:4924277-4926794 FORWARD	T	30	30.2	plasma membrane	PM
AT1G56145	AT1G56145	receptor kinases	LRR_clade_3	LRR VIIIB**	627	1012	receptor	30.2.8.2	signalling.receptor kinases.leucine rich repeat VIII.VIII-2	leucine-rich repeat family protein / protein kinase family protein | chr1:21008093-21014012 REVERSE	T	30	30.2	plasma membrane	PM
AT1G56120	AT1G56120	receptor kinases	LRR_clade_3	LRR VIIIB**	652	1047	receptor	30.2.8.2	signalling.receptor kinases.leucine rich repeat VIII.VIII-2	kinase | chr1:20987288-20993072 REVERSE	T	30	30.2	plasma membrane	PM
AT1G56130	AT1G56130	receptor kinases	LRR_clade_3	LRR VIIIB**	634	1032	receptor	30.2.8.2	signalling.receptor kinases.leucine rich repeat VIII.VIII-2	leucine-rich repeat family protein / protein kinase family protein | chr1:20994931-21000887 REVERSE	T	30	30.2	plasma membrane	PM
AT1G53430	AT1G53430	receptor kinases	LRR_clade_3	LRR VIIIB**	599	1030	receptor	30.2.8.2	signalling.receptor kinases.leucine rich repeat VIII.VIII-2	leucine-rich repeat family protein / protein kinase family protein | chr1:19935167-19941088 FORWARD	T	30	30.2	plasma membrane	PM
AT1G53440	AT1G53440	receptor kinases	LRR_clade_3	LRR VIIIB**	575	1035	receptor	30.2.8.2	signalling.receptor kinases.leucine rich repeat VIII.VIII-2	leucine-rich repeat family protein / protein kinase family protein | chr1:19945959-19951562 FORWARD	T	30	30.2	plasma membrane	PM
AT1G53420	AT1G53420	receptor kinases	LRR_clade_3	LRR VIIIB**	564	953	receptor	30.2.8.2	signalling.receptor kinases.leucine rich repeat VIII.VIII-2	serine/threonine protein kinase-related | chr1:19926626-19931494 REVERSE	T	30	30.2	plasma membrane	PM
AT1G07650	AT1G07650	receptor kinases	LRR_clade_3	LRR VIIIB**	623	1014	receptor	30.2.8.2	signalling.receptor kinases.leucine rich repeat VIII.VIII-2	leucine-rich repeat transmembrane protein kinase, putative | chr1:2359549-2366561 REVERSE	T	30	30.2	plasma membrane	PM
AT1G29750	RKF1	receptor kinases	LRR_clade_3	LRR VIIIB**	609	1006	receptor	30.2.8.2	signalling.receptor kinases.leucine rich repeat VIII.VIII-2	Symbols: RKF1 | RKF1 (RECEPTOR-LIKE KINASE IN FLOWERS 1); ATP binding / kinase/ protein serine/threonine kinase/ receptor signaling protein serine/threonine kinase | chr1:10413881-10420524 REVERSE	T	30	30.2	plasma membrane	PM
AT1G29720	AT1G29720	receptor kinases	LRR_clade_3	LRR VIIIB**	616	1019	receptor	30.2.8.2	signalling.receptor kinases.leucine rich repeat VIII.VIII-2	protein kinase family protein | chr1:10393797-10396326 REVERSE	T	30	30.2	plasma membrane	PM
AT1G29740	AT1G29740	receptor kinases	LRR_clade_3	LRR VIIIB**	629	1078	receptor	30.2.8.2	signalling.receptor kinases.leucine rich repeat VIII.VIII-2	kinase | chr1:10407379-10412997 REVERSE	T	30	30.2	plasma membrane	PM
AT4G08850	MIK2	receptor kinases	LRR_11	LRR XI	709	1045	receptor	30.2.12	signalling.receptor kinases.leucine rich repeat XII	kinase | chr4:5636489-5640636 REVERSE	T	30	30.2	plasma membrane	PM
AT1G35710	AT1G35710	receptor kinases	LRR_11	LRR XI	784	1120	receptor	30.2.12	signalling.receptor kinases.leucine rich repeat XII	leucine-rich repeat transmembrane protein kinase, putative | chr1:13220940-13224681 FORWARD	T	30	30.2	plasma membrane	PM
AT3G19700	IKU2	receptor kinases	LRR_11	LRR XI	615	991	receptor	30.2.11	signalling.receptor kinases.leucine rich repeat XI	Symbols: IKU2 | IKU2 (HAIKU2); ATP binding / protein binding / protein kinase/ protein serine/threonine kinase | chr3:6843662-6847275 FORWARD	T	30	30.2	plasma membrane	PM
AT5G49660	XIP1/CEPR1	receptor kinases	LRR_11	LRR XI	590	966	receptor	30.2.11	signalling.receptor kinases.leucine rich repeat XI	leucine-rich repeat transmembrane protein kinase, putative | chr5:20161206-20164729 REVERSE	T	30	30.2	plasma membrane	PM
AT5G44700	GSO2/EDA23	receptor kinases	LRR_11	LRR XI	875	1252	receptor	30.2.11	signalling.receptor kinases.leucine rich repeat XI	Symbols: EDA23, GSO2 | GSO2 (GASSHO 2); ATP binding / protein binding / protein kinase/ protein serine/threonine kinase/ protein tyrosine kinase | chr5:18032864-18036894 REVERSE	T	30	30.2	plasma membrane	PM
AT4G20140	GSO1	receptor kinases	LRR_11	LRR XI	875	1249	receptor	30.2.11	signalling.receptor kinases.leucine rich repeat XI	Symbols: GSO1 | GSO1 (GASSHO1); ATP binding / protein binding / protein kinase/ protein serine/threonine kinase/ protein tyrosine kinase | chr4:10884197-10888270 FORWARD	T	30	30.2	plasma membrane	PM
AT4G28490	HAESA	receptor kinases	LRR_11	LRR XI	621	999	receptor	30.2.11	signalling.receptor kinases.leucine rich repeat XI	Symbols: RLK5, HAE | HAE (HAESA); ATP binding / kinase/ protein kinase/ protein serine/threonine kinase | chr4:14077857-14081171 FORWARD	T	30	30.2	plasma membrane	PM
AT1G28440	HSL1	receptor kinases	LRR_11	LRR XI	618	996	receptor	30.2.11	signalling.receptor kinases.leucine rich repeat XI	Symbols: HSL1 | HSL1 (HAESA-Like 1); ATP binding / kinase/ protein serine/threonine kinase | chr1:9996824-10000447 FORWARD	T	30	30.2	plasma membrane	PM
AT1G72180	CEPR2	receptor kinases	LRR_11	LRR XI	621	977	receptor	30.2.11	signalling.receptor kinases.leucine rich repeat XI	leucine-rich repeat transmembrane protein kinase, putative | chr1:27162820-27167430 FORWARD	T	30	30.2	plasma membrane	PM
AT5G25930	AT5G25930	receptor kinases	LRR_11	LRR XI	628	1005	receptor	30.2.11	signalling.receptor kinases.leucine rich repeat XI	leucine-rich repeat family protein / protein kinase family protein | chr5:9050794-9054143 FORWARD	T	30	30.2	plasma membrane	PM
AT5G65710	HSL2	receptor kinases	LRR_11	LRR XI	630	993	receptor	30.2.11	signalling.receptor kinases.leucine rich repeat XI	Symbols: HSL2 | HSL2 (HAESA-Like 2); ATP binding / kinase/ protein serine/threonine kinase | chr5:26292372-26295440 FORWARD	T	30	30.2	plasma membrane	PM
AT4G28650	MIK1/PXL2	receptor kinases	LRR_11	LRR XI	634	1013	receptor	30.2.11	signalling.receptor kinases.leucine rich repeat XI	leucine-rich repeat transmembrane protein kinase, putative | chr4:14143984-14147537 REVERSE	T	30	30.2	plasma membrane	PM
AT1G08590	AT1G08590	receptor kinases	LRR_11	LRR XI	714	1029	receptor	30.2.11	signalling.receptor kinases.leucine rich repeat XI	CLAVATA1 receptor kinase (CLV1) | chr1:2718778-2722221 FORWARD	T	30	30.2	plasma membrane	PM
AT5G61480	PXY	receptor kinases	LRR_11	LRR XI	651	1041	receptor	30.2.11	signalling.receptor kinases.leucine rich repeat XI	leucine-rich repeat transmembrane protein kinase, putative | chr5:24724541-24727842 REVERSE	T	30	30.2	plasma membrane	PM
AT5G06940	AT5G06940	receptor kinases	LRR_11	LRR XI*	540	872	receptor	30.2.99	signalling.receptor kinases.misc	leucine-rich repeat family protein | chr5:2148078-2150771 REVERSE	T	30	30.2	plasma membrane	PM
AT1G73080	PEPR1	receptor kinases	LRR_11	LRR XI	769	1123	receptor	30.2.11	signalling.receptor kinases.leucine rich repeat XI	Symbols: PEPR1 | PEPR1 (PEP1 receptor 1); ATP binding / kinase/ protein binding / protein serine/threonine kinase | chr1:27484513-27488201 FORWARD	T	30	30.2	plasma membrane	PM
AT1G17750	PEPR2	receptor kinases	LRR_11	LRR XI	737	1088	receptor	30.2.11	signalling.receptor kinases.leucine rich repeat XI	leucine-rich repeat transmembrane protein kinase, putative | chr1:6106656-6110120 FORWARD	T	30	30.2	plasma membrane	PM
AT5G63930	AT5G63930	receptor kinases	LRR_11	LRR XI	737	1102	receptor	30.2.11	signalling.receptor kinases.leucine rich repeat XI	leucine-rich repeat transmembrane protein kinase, putative | chr5:25583006-25586499 FORWARD	T	30	30.2	plasma membrane	PM
AT2G33170	AT2G33170	receptor kinases	LRR_11	LRR XI	753	1124	receptor	30.2.11	signalling.receptor kinases.leucine rich repeat XI	leucine-rich repeat transmembrane protein kinase, putative | chr2:14056250-14060641 REVERSE	T	30	30.2	plasma membrane	PM
AT1G17230	AT1G17230	receptor kinases	LRR_11	LRR XI	734	1101	receptor	30.2.11	signalling.receptor kinases.leucine rich repeat XI	ATP binding / protein binding / protein kinase/ protein serine/threonine kinase/ protein tyrosine kinase | chr1:5891324-5895075 FORWARD	T	30	30.2	plasma membrane	PM
AT1G34420	AT1G34420	receptor kinases	LRR_11	LRR XI**	612	966	receptor	30.2.10	signalling.receptor kinases.leucine rich repeat X	leucine-rich repeat family protein / protein kinase family protein | chr1:12584587-12587570 FORWARD	T	30	30.2	plasma membrane	PM
AT2G41820	PXC3	receptor kinases	LRR_11	LRR XI**	534	890	receptor	30.2.10	signalling.receptor kinases.leucine rich repeat X	leucine-rich repeat transmembrane protein kinase, putative | chr2:17446744-17450071 FORWARD	T	30	30.2	plasma membrane	PM
AT1G34110	RGI5	receptor kinases	LRR_11	LRR XI	704	1072	receptor	30.2.11	signalling.receptor kinases.leucine rich repeat XI	leucine-rich repeat transmembrane protein kinase, putative | chr1:12417176-12421189 REVERSE	T	30	30.2	extracellular	EX
AT5G48940	RGFR2	receptor kinases	LRR_11	LRR XI	722	1135	receptor	30.2.11	signalling.receptor kinases.leucine rich repeat XI	leucine-rich repeat transmembrane protein kinase, putative | chr5:19839710-19843807 FORWARD	T	30	30.2	plasma membrane	PM
AT3G24240	RGFR1	receptor kinases	LRR_11	LRR XI	725	1141	receptor	30.2.11	signalling.receptor kinases.leucine rich repeat XI	leucine-rich repeat transmembrane protein kinase, putative | chr3:8780424-8784368 FORWARD	T	30	30.2	plasma membrane	PM
AT5G56040	SKM2	receptor kinases	LRR_11	LRR XI	702	953	receptor	30.2.11	signalling.receptor kinases.leucine rich repeat XI	leucine-rich repeat protein kinase, putative | chr5:22694878-22698628 FORWARD	T	30	30.2	plasma membrane	PM
AT4G20270	BAM3	receptor kinases	LRR_11	LRR XI	658	992	receptor	33.99	development.unspecified	Symbols: BAM3 | BAM3 (BARELY ANY MERISTEM 3); ATP binding / protein binding / protein kinase/ protein serine/threonine kinase | chr4:10949661-10953083 FORWARD	T	33	33.99	plasma membrane	PM
AT3G49670	BAM2	receptor kinases	LRR_11	LRR XI	637	1002	receptor	33.99	development.unspecified	Symbols: BAM2 | BAM2 (BARELY ANY MERISTEM 2); ATP binding / protein binding / protein kinase/ protein serine/threonine kinase | chr3:18417568-18421106 FORWARD	T	33	33.99	plasma membrane	PM
AT5G65700	BAM1	receptor kinases	LRR_11	LRR XI	641	1003	receptor	30.2.11	signalling.receptor kinases.leucine rich repeat XI	Symbols: BAM1 | BAM1 (BARELY ANY MERISTEM 1); ATP binding / kinase/ protein serine/threonine kinase | chr5:26281757-26285247 FORWARD	T	30	30.2	plasma membrane	PM
AT1G75820	CLV1	receptor kinases	LRR_11	LRR XI	640	980	receptor	30.2.11	signalling.receptor kinases.leucine rich repeat XI	Symbols: CLV1, FAS3, FLO5 | CLV1 (CLAVATA 1); ATP binding / kinase/ protein serine/threonine kinase/ receptor signaling protein serine/threonine kinase | chr1:28463462-28466971 REVERSE	T	30	30.2	plasma membrane	PM
AT5G07180	ERL2	receptor kinases	LRR_11	LRR XI	584	967	receptor	30.2.13	signalling.receptor kinases.leucine rich repeat XIII	Symbols: ERL2 | ERL2 (ERECTA-LIKE 2); kinase | chr5:2227571-2233417 REVERSE	T	30	30.2	plasma membrane	PM
AT5G62230	ERL1	receptor kinases	LRR_11	LRR XI	581	966	receptor	30.2.13	signalling.receptor kinases.leucine rich repeat XIII	Symbols: ERL1 | ERL1 (ERECTA-LIKE 1); kinase | chr5:24996234-25002340 FORWARD	T	30	30.2	plasma membrane	PM
AT2G26330	ERECTA	receptor kinases	LRR_11	LRR XI	579	976	receptor	30.2.13	signalling.receptor kinases.leucine rich repeat XIII	Symbols: ER, QRP1 | ER (ERECTA); transmembrane receptor protein kinase | chr2:11208183-11213971 REVERSE	T	30	30.2	plasma membrane	PM
AT4G39400	BRI1	receptor kinases	LRR_clade_4	LRR X*	791	1196	receptor	17.3.2.1	hormone metabolism.brassinosteroid.signal transduction.BRI	Symbols: BRI1, CBB2, DWF2, BIN1, ATBRI1 | BRI1 (BRASSINOSTEROID INSENSITIVE 1); kinase/ protein binding / protein heterodimerization/ protein homodimerization/ protein kinase/ protein serine/threonine kinase | chr4:18324661-18328826 FORWARD	T	17	17.3	plasma membrane	PM
AT2G01950	BRL2	receptor kinases	LRR_clade_4	LRR X*	755	1143	receptor	17.3.2.1	hormone metabolism.brassinosteroid.signal transduction.BRI	Symbols: VH1, BRL2 | BRL2 (BRI1-LIKE 2); ATP binding / protein serine/threonine kinase/ transmembrane receptor protein serine/threonine kinase | chr2:440636-444276 REVERSE	T	17	17.3	plasma membrane	PM
AT1G55610	BRL1	receptor kinases	LRR_clade_4	LRR X	776	1166	receptor	30.2.10	signalling.receptor kinases.leucine rich repeat X	Symbols: BRL1 | BRL1 (BRI 1 LIKE); kinase | chr1:20779874-20784017 REVERSE	T	30	30.2	plasma membrane	PM
AT3G13380	BRL3	receptor kinases	LRR_clade_4	LRR X*	772	1164	receptor	17.3.2.1	hormone metabolism.brassinosteroid.signal transduction.BRI	Symbols: BRL3 | BRL3 (BRI1-LIKE 3); ATP binding / protein binding / protein kinase/ protein serine/threonine kinase | chr3:4346557-4350923 FORWARD	T	17	17.3	plasma membrane	PM
AT2G24230	AT2G24230	receptor kinases	LRR_clade_4	LRR X**	455	853	receptor	30.2.7	signalling.receptor kinases.leucine rich repeat VII	leucine-rich repeat transmembrane protein kinase, putative | chr2:10301817-10304812 REVERSE	T	30	30.2	plasma membrane	PM
AT5G58150	AT5G58150	receptor kinases	LRR_clade_4	LRR X**	436	785	receptor	30.2.7	signalling.receptor kinases.leucine rich repeat VII	leucine-rich repeat transmembrane protein kinase, putative | chr5:23530081-23532840 REVERSE	T	30	30.2	plasma membrane	PM
AT5G07280	EMS1	receptor kinases	LRR_clade_4	LRR X	825	1192	receptor	30.2.10	signalling.receptor kinases.leucine rich repeat X	Symbols: EMS1, EXS | EMS1 (EXCESS MICROSPOROCYTES1); kinase/ transmembrane receptor protein kinase | chr5:2285040-2288686 FORWARD	T	30	30.2	plasma membrane	PM
AT2G02220	PSKR1	receptor kinases	LRR_clade_4	LRR X	657	1008	receptor	30.2.10	signalling.receptor kinases.leucine rich repeat X	Symbols: ATPSKR1, PSKR1 | PSKR1 (PHYTOSULFOKIN RECEPTOR 1); ATP binding / peptide receptor/ protein serine/threonine kinase | chr2:583978-587124 REVERSE	T	30	30.2	plasma membrane	PM
AT1G72300	PSY1R	receptor kinases	LRR_clade_4	LRR X	716	1095	receptor	30.2.10	signalling.receptor kinases.leucine rich repeat X	leucine-rich repeat transmembrane protein kinase, putative | chr1:27217477-27221123 REVERSE	T	30	30.2	plasma membrane	PM
AT5G53890	PSKR2	receptor kinases	LRR_clade_4	LRR X	677	1036	receptor	30.2.10	signalling.receptor kinases.leucine rich repeat X	leucine-rich repeat transmembrane protein kinase, putative | chr5:21876861-21880461 FORWARD	T	30	30.2	plasma membrane	PM
AT1G62950	AT1G62950	receptor kinases	LRR_clade_4	LRR VII	517	890	receptor	30.2.7	signalling.receptor kinases.leucine rich repeat VII	leucine-rich repeat transmembrane protein kinase, putative | chr1:23315294-23318234 FORWARD	T	30	30.2	plasma membrane	PM
AT1G12460	AT1G12460	receptor kinases	LRR_clade_4	LRR VII	513	882	receptor	30.2.7	signalling.receptor kinases.leucine rich repeat VII	leucine-rich repeat transmembrane protein kinase, putative | chr1:4247249-4250630 FORWARD	T	30	30.2	plasma membrane	PM
AT5G01890	PXC2	receptor kinases	LRR_clade_4	LRR VII	607	967	receptor	30.2.7	signalling.receptor kinases.leucine rich repeat VII	leucine-rich repeat transmembrane protein kinase, putative | chr5:341543-345127 REVERSE	T	30	30.2	plasma membrane	PM
AT3G56370	AT3G56370	receptor kinases	LRR_clade_4	LRR VII	603	964	receptor	30.2.7	signalling.receptor kinases.leucine rich repeat VII	leucine-rich repeat transmembrane protein kinase, putative | chr3:20899099-20902981 REVERSE	T	30	30.2	plasma membrane	PM
AT3G28040	AT3G28040	receptor kinases	LRR_clade_4	LRR VII	644	1016	receptor	30.2.7	signalling.receptor kinases.leucine rich repeat VII	leucine-rich repeat transmembrane protein kinase, putative | chr3:10435057-10438391 FORWARD	T	30	30.2	plasma membrane	PM
AT4G36180	AT4G36180	receptor kinases	LRR_clade_4	LRR VIIA**	755	1136	receptor	30.2.7	signalling.receptor kinases.leucine rich repeat VII	leucine-rich repeat family protein | chr4:17120085-17123841 REVERSE	T	30	30.2	plasma membrane	PM
AT1G75640	AT1G75640	receptor kinases	LRR_clade_4	LRR VIIA**	754	1140	receptor	30.2.7	signalling.receptor kinases.leucine rich repeat VII	leucine-rich repeat family protein / protein kinase family protein | chr1:28403466-28407051 REVERSE	T	30	30.2	plasma membrane	PM
AT3G51740	IMK2	receptor kinases	LRR_clade_4	LRR III*	459	836	receptor	17.3.2.1	hormone metabolism.brassinosteroid.signal transduction.BRI	Symbols: IMK2 | IMK2 (INFLORESCENCE MERISTEM RECEPTOR-LIKE KINASE 2); ATP binding / kinase/ protein kinase/ protein serine/threonine kinase | chr3:19189049-19192051 FORWARD	T	17	17.3	plasma membrane	PM
AT5G10020	SIRK1	receptor kinases	LRR_clade_4	LRR III	599	1048	receptor	30.2.3	signalling.receptor kinases.leucine rich repeat III	leucine-rich repeat transmembrane protein kinase, putative | chr5:3133261-3137242 FORWARD	T	30	30.2	plasma membrane	PM
AT2G16250	AT2G16250	receptor kinases	LRR_14	LRR XIV	450	915	receptor	30.2.14	signalling.receptor kinases.leucine rich repeat XIV	leucine-rich repeat transmembrane protein kinase, putative | chr2:7039682-7042933 REVERSE	T	30	30.2	plasma membrane	PM
AT4G39270	AT4G39270	receptor kinases	LRR_14	LRR XIV	417	864	receptor	30.2.14	signalling.receptor kinases.leucine rich repeat XIV	leucine-rich repeat transmembrane protein kinase, putative | chr4:18276505-18279848 FORWARD	T	30	30.2	plasma membrane	PM
AT3G47110	XPS1	receptor kinases	LRR_12	LRR XII	656	1025	receptor	30.2.12	signalling.receptor kinases.leucine rich repeat XII	leucine-rich repeat transmembrane protein kinase, putative | chr3:17347103-17350296 REVERSE	T	30	30.2	plasma membrane	PM
AT5G20480	EFR	receptor kinases	LRR_12	LRR XII	649	1031	receptor	30.2.12	signalling.receptor kinases.leucine rich repeat XII	Symbols: EFR | EFR (EF-TU RECEPTOR); ATP binding / kinase/ protein serine/threonine kinase | chr5:6922480-6925887 FORWARD	T	30	30.2	plasma membrane	PM
AT3G47570	AT3G47570	receptor kinases	LRR_12	LRR XII	643	1010	receptor	30.2.12	signalling.receptor kinases.leucine rich repeat XII	leucine-rich repeat transmembrane protein kinase, putative | chr3:17527507-17530929 FORWARD	T	30	30.2	plasma membrane	PM
AT3G47090	AT3G47090	receptor kinases	LRR_12	LRR XII	642	1009	receptor	30.2.12	signalling.receptor kinases.leucine rich repeat XII	leucine-rich repeat transmembrane protein kinase, putative | chr3:17341512-17344645 REVERSE	T	30	30.2	plasma membrane	PM
AT3G47580	AT3G47580	receptor kinases	LRR_12	LRR XII	644	1011	receptor	30.2.12	signalling.receptor kinases.leucine rich repeat XII	leucine-rich repeat transmembrane protein kinase, putative | chr3:17532648-17536059 FORWARD	T	30	30.2	plasma membrane	PM
AT2G24130	AT2G24130	receptor kinases	LRR_12	LRR XII	592	980	receptor	30.2.12	signalling.receptor kinases.leucine rich repeat XII	leucine-rich repeat transmembrane protein kinase, putative | chr2:10258148-10261220 FORWARD	T	30	30.2	plasma membrane	PM
AT5G46330	FLS2	receptor kinases	LRR_12	LRR XII	806	1173	receptor	30.2.12	signalling.receptor kinases.leucine rich repeat XII	Symbols: FLS2 | FLS2 (FLAGELLIN-SENSITIVE 2); ATP binding / kinase/ protein binding / protein serine/threonine kinase/ transmembrane receptor protein serine/threonine kinase | chr5:18791736-18795546 FORWARD	T	30	30.2	plasma membrane	PM
AT3G23750	BARK1	receptor kinases	LRR_clade_2	LRR IX	472	928	receptor	30.2.9	signalling.receptor kinases.leucine rich repeat IX	leucine-rich repeat family protein / protein kinase family protein | chr3:8558332-8561428 FORWARD	T	30	30.2	plasma membrane	PM
AT1G24650	AT1G24650	receptor kinases	LRR_clade_2	LRR IX	460	886	receptor	30.2.9	signalling.receptor kinases.leucine rich repeat IX	leucine-rich repeat family protein / protein kinase family protein | chr1:8734570-8737315 FORWARD	T	30	30.2	plasma membrane	PM
AT1G66150	TMK1	receptor kinases	LRR_clade_2	LRR IX	480	942	receptor	30.2.9	signalling.receptor kinases.leucine rich repeat IX	Symbols: TMK1 | TMK1 (TRANSMEMBRANE KINASE 1); transmembrane receptor protein serine/threonine kinase | chr1:24631409-24634749 FORWARD	T	30	30.2	plasma membrane	PM
AT2G01820	AT2G01820	receptor kinases	LRR_clade_2	LRR IX	482	943	receptor	30.2.9	signalling.receptor kinases.leucine rich repeat IX	leucine-rich repeat protein kinase, putative | chr2:357431-360681 REVERSE	T	30	30.2	plasma membrane	PM
AT5G37450	AT5G37450	receptor kinases	Mixed_clade_1	LRR VIIIA	539	935	receptor	30.2.8.1	signalling.receptor kinases.leucine rich repeat VIII.VIII-1	leucine-rich repeat transmembrane protein kinase, putative | chr5:14852801-14857098 REVERSE	T	30	30.2	plasma membrane	PM
AT1G06840	AT1G06840	receptor kinases	Mixed_clade_1	LRR VIIIA	560	953	receptor	30.2.8.1	signalling.receptor kinases.leucine rich repeat VIII.VIII-1	leucine-rich repeat transmembrane protein kinase, putative | chr1:2097747-2103479 REVERSE	T	30	30.2	plasma membrane	PM
AT5G01950	AT5G01950	receptor kinases	Mixed_clade_1	LRR VIIIA	562	951	receptor	30.2.8.1	signalling.receptor kinases.leucine rich repeat VIII.VIII-1	ATP binding / kinase/ protein serine/threonine kinase | chr5:364902-370186 REVERSE	T	30	30.2	plasma membrane	PM
AT5G49760	AT5G49760	receptor kinases	Mixed_clade_1	LRR VIIIA	559	953	receptor	30.2.8.1	signalling.receptor kinases.leucine rich repeat VIII.VIII-1	leucine-rich repeat family protein / protein kinase family protein | chr5:20216372-20221299 FORWARD	T	30	30.2	plasma membrane	PM
AT5G49770	AT5G49770	receptor kinases	Mixed_clade_1	LRR VIIIA	562	946	receptor	30.2.8.1	signalling.receptor kinases.leucine rich repeat VIII.VIII-1	leucine-rich repeat transmembrane protein kinase, putative | chr5:20222669-20227267 FORWARD	T	30	30.2	plasma membrane	PM
AT5G49780	AT5G49780	receptor kinases	Mixed_clade_1	LRR VIIIA	440	857	receptor	30.2.8.1	signalling.receptor kinases.leucine rich repeat VIII.VIII-1	ATP binding / kinase/ protein serine/threonine kinase | chr5:20229256-20233095 FORWARD	T	30	30.2	plasma membrane	PM
AT1G79620	AT1G79620	receptor kinases	Mixed_clade_1	LRR VIIIA	564	971	receptor	30.2.8.1	signalling.receptor kinases.leucine rich repeat VIII.VIII-1	leucine-rich repeat transmembrane protein kinase, putative | chr1:29957562-29962305 REVERSE	T	30	30.2	plasma membrane	PM
AT4G29180	RHS16	receptor kinases	LRR_clade_1	LRR I	507	911	receptor	30.2.1	signalling.receptor kinases.leucine rich repeat I	leucine-rich repeat protein kinase, putative | chr4:14385593-14389689 FORWARD	T	30	30.2	plasma membrane	PM
AT4G29450	AT4G29450	receptor kinases	LRR_clade_1	LRR I	513	863	receptor	30.2.1	signalling.receptor kinases.leucine rich repeat I	leucine-rich repeat protein kinase, putative | chr4:14478837-14482626 REVERSE	T	30	30.2	plasma membrane	PM
AT1G51910	AT1G51910	receptor kinases	LRR_clade_1	LRR I	508	876	receptor	30.2.1	signalling.receptor kinases.leucine rich repeat I	protein kinase family protein | chr1:19284277-19288385 REVERSE	T	30	30.2	plasma membrane	PM
AT1G51890	AT1G51890	receptor kinases	LRR_clade_1	LRR I*	499	876	receptor	30.2.99	signalling.receptor kinases.misc	leucine-rich repeat protein kinase, putative | chr1:19274802-19278528 REVERSE	T	30	30.2	plasma membrane	PM
AT1G51860	AT1G51860	receptor kinases	LRR_clade_1	LRR I*	511	890	receptor	30.2.99	signalling.receptor kinases.misc	leucine-rich repeat protein kinase, putative | chr1:19257634-19261479 REVERSE	T	30	30.2	plasma membrane	PM
AT1G51870	AT1G51870	receptor kinases	LRR_clade_1	LRR I	460	837	receptor	30.2.1	signalling.receptor kinases.leucine rich repeat I	protein kinase family protein | chr1:19262879-19267001 REVERSE	T	30	30.2	plasma membrane	PM
AT1G51880	RHS6	receptor kinases	LRR_clade_1	LRR I*	519	880	receptor	30.2.99	signalling.receptor kinases.misc	leucine-rich repeat protein kinase, putative | chr1:19270193-19274068 REVERSE	T	30	30.2	plasma membrane	PM
AT1G07560	AT1G07560	receptor kinases	LRR_clade_1	LRR I	511	871	receptor	30.2.1	signalling.receptor kinases.leucine rich repeat I	leucine-rich repeat protein kinase, putative | chr1:2327320-2331096 FORWARD	T	30	30.2	plasma membrane	PM
AT5G59650	AT5G59650	receptor kinases	LRR_clade_1	LRR I	518	892	receptor	30.2.1	signalling.receptor kinases.leucine rich repeat I	leucine-rich repeat protein kinase, putative | chr5:24031346-24035100 FORWARD	T	30	30.2	plasma membrane	PM
AT5G59680	AT5G59680	receptor kinases	LRR_clade_1	LRR I	508	887	receptor	30.2.1	signalling.receptor kinases.leucine rich repeat I	leucine-rich repeat protein kinase, putative | chr5:24046792-24050801 FORWARD	T	30	30.2	plasma membrane	PM
AT5G59670	AT5G59670	receptor kinases	LRR_clade_1	LRR I	499	868	receptor	30.2.1	signalling.receptor kinases.leucine rich repeat I	leucine-rich repeat protein kinase, putative | chr5:24041494-24045652 FORWARD	T	30	30.2	plasma membrane	PM
AT5G59660	AT5G59660	receptor kinases	LRR_clade_1	LRR I	445	852	receptor	30.2.1	signalling.receptor kinases.leucine rich repeat I	leucine-rich repeat protein kinase, putative | chr5:24035687-24039979 FORWARD	T	30	30.2	plasma membrane	PM
AT3G46330	MEE39	receptor kinases	LRR_clade_1	LRR I*	515	878	receptor	30.2.99	signalling.receptor kinases.misc	Symbols: MEE39 | MEE39 (maternal effect embryo arrest 39); kinase | chr3:17020747-17025011 REVERSE	T	30	30.2	plasma membrane	PM
AT3G46350	AT3G46350	receptor kinases	LRR_clade_1	LRR I	491	871	receptor	30.2.1	signalling.receptor kinases.leucine rich repeat I	leucine-rich repeat protein kinase, putative | chr3:17036427-17041680 FORWARD	T	30	30.2	plasma membrane	PM
AT3G46340	AT3G46340	receptor kinases	LRR_clade_1	LRR I*	513	889	receptor	30.2.99	signalling.receptor kinases.misc	leucine-rich repeat protein kinase, putative | chr3:17026658-17031842 FORWARD	T	30	30.2	plasma membrane	PM
AT3G46400	AT3G46400	receptor kinases	LRR_clade_1	LRR I*	508	883	receptor	30.2.99	signalling.receptor kinases.misc	leucine-rich repeat protein kinase, putative | chr3:17073196-17077328 FORWARD	T	30	30.2	plasma membrane	PM
AT3G46370	AT3G46370	receptor kinases	LRR_clade_1	LRR I*	427	793	receptor	30.2.99	signalling.receptor kinases.misc	leucine-rich repeat protein kinase, putative | chr3:17051955-17055514 FORWARD	T	30	30.2	plasma membrane	PM
AT4G20450	AT4G20450	receptor kinases	LRR_clade_1	LRR I*	538	898	receptor	30.2.99	signalling.receptor kinases.misc	leucine-rich repeat protein kinase, putative | chr4:11024054-11029008 REVERSE	T	30	30.2	plasma membrane	PM
AT2G28990	AT2G28990	receptor kinases	LRR_clade_1	LRR I*	506	884	receptor	30.2.99	signalling.receptor kinases.misc	leucine-rich repeat protein kinase, putative | chr2:12455055-12459541 FORWARD	T	30	30.2	plasma membrane	PM
AT2G28970	AT2G28970	receptor kinases	LRR_clade_1	LRR I*	409	786	receptor	30.2.99	signalling.receptor kinases.misc	leucine-rich repeat protein kinase, putative | chr2:12443919-12448163 FORWARD	T	30	30.2	plasma membrane	PM
AT5G16900	AT5G16900	receptor kinases	LRR_clade_1	LRR I*	514	866	receptor	30.2.99	signalling.receptor kinases.misc	leucine-rich repeat protein kinase, putative | chr5:5555254-5559715 FORWARD	T	30	30.2	plasma membrane	PM
AT2G28960	AT2G28960	receptor kinases	LRR_clade_1	LRR I*	509	880	receptor	30.2.99	signalling.receptor kinases.misc	leucine-rich repeat protein kinase, putative | chr2:12437914-12442347 REVERSE	T	30	30.2	plasma membrane	PM
AT1G07550	AT1G07550	receptor kinases	LRR_clade_1	LRR I	505	864	receptor	30.2.1	signalling.receptor kinases.leucine rich repeat I	leucine-rich repeat protein kinase, putative | chr1:2322653-2326561 REVERSE	T	30	30.2	plasma membrane	PM
AT2G14440	AT2G14440	receptor kinases	LRR_clade_1	LRR I*	526	886	receptor	30.2.99	signalling.receptor kinases.misc	leucine-rich repeat protein kinase, putative | chr2:6143073-6147419 FORWARD	T	30	30.2	plasma membrane	PM
AT2G14510	AT2G14510	receptor kinases	LRR_clade_1	LRR I	508	868	receptor	30.2.1	signalling.receptor kinases.leucine rich repeat I	leucine-rich repeat protein kinase, putative | chr2:6171133-6175052 REVERSE	T	30	30.2	plasma membrane	PM
AT2G29000	AT2G29000	receptor kinases	LRR_clade_1	LRR I*	506	872	receptor	29.4	protein.postranslational modification	leucine-rich repeat family protein / protein kinase family protein | chr2:12460781-12465037 FORWARD	T	29	29.4	plasma membrane	PM
AT1G49100	AT1G49100	receptor kinases	LRR_clade_1	LRR I*	518	888	receptor	30.2.99	signalling.receptor kinases.misc	leucine-rich repeat protein kinase, putative | chr1:18166147-18170105 REVERSE	T	30	30.2	plasma membrane	PM
AT3G21340	AT3G21340	receptor kinases	LRR_clade_1	LRR I	520	899	receptor	30.2.1	signalling.receptor kinases.leucine rich repeat I	leucine-rich repeat protein kinase, putative | chr3:7511787-7515937 REVERSE	T	30	30.2	plasma membrane	PM
AT2G04300	AT2G04300	receptor kinases	LRR_clade_1	LRR I*	480	851	receptor	30.2.99	signalling.receptor kinases.misc	leucine-rich repeat protein kinase, putative | chr2:1493009-1497016 FORWARD	T	30	30.2	plasma membrane	PM
AT1G51820	SIF4	receptor kinases	LRR_clade_1	LRR I*	505	885	receptor	30.2.99	signalling.receptor kinases.misc	leucine-rich repeat protein kinase, putative | chr1:19237407-19241883 REVERSE	T	30	30.2	plasma membrane	PM
AT1G51850	SIF2	receptor kinases	LRR_clade_1	LRR I*	485	865	receptor	30.2.99	signalling.receptor kinases.misc	leucine-rich repeat protein kinase, putative | chr1:19252847-19256783 REVERSE	T	30	30.2	plasma membrane	PM
AT1G51805	SIF3	receptor kinases	LRR_clade_1	LRR I*	504	884	receptor	30.2.99	signalling.receptor kinases.misc	leucine-rich repeat protein kinase, putative | chr1:19220977-19225689 REVERSE	T	30	30.2	plasma membrane	PM
AT1G51800	IOS1	receptor kinases	LRR_clade_1	LRR I*	513	894	receptor	30.2.99	signalling.receptor kinases.misc	leucine-rich repeat protein kinase, putative | chr1:19214148-19217970 FORWARD	T	30	30.2	plasma membrane	PM
AT1G05700	AT1G05700	receptor kinases	LRR_clade_1	LRR I*	509	852	receptor	30.2.99	signalling.receptor kinases.misc	leucine-rich repeat protein kinase, putative | chr1:1709796-1713245 FORWARD	T	30	30.2	plasma membrane	PM
AT2G19190	FRK1	receptor kinases	LRR_clade_1	LRR I	516	876	receptor	30.2.1	signalling.receptor kinases.leucine rich repeat I	Symbols: FRK1 | FRK1 (FLG22-INDUCED RECEPTOR-LIKE KINASE 1); kinase | chr2:8326049-8329944 REVERSE	T	30	30.2	plasma membrane	PM
AT4G29990	AT4G29990	receptor kinases	LRR_clade_1	LRR I	511	876	receptor	30.2.1	signalling.receptor kinases.leucine rich repeat I	light repressible receptor protein kinase | chr4:14665691-14670030 REVERSE	T	30	30.2	plasma membrane	PM
AT2G19230	AT2G19230	receptor kinases	LRR_clade_1	LRR I*	516	1025	receptor	30.2.99	signalling.receptor kinases.misc	kinase | chr2:8343452-8348431 REVERSE	T	30	30.2	plasma membrane	PM
AT2G19210	AT2G19210	receptor kinases	LRR_clade_1	LRR I*	516	881	receptor	30.2.99	signalling.receptor kinases.misc	leucine-rich repeat protein kinase, putative | chr2:8335639-8339307 REVERSE	T	30	30.2	plasma membrane	PM
AT1G51790	AT1G51790	receptor kinases	LRR_clade_1	LRR I*	518	882	receptor	30.2.99	signalling.receptor kinases.misc	kinase | chr1:19206711-19211417 REVERSE	T	30	30.2	plasma membrane	PM
AT2G37050	AT2G37050	receptor kinases	LRR_clade_1	LRR I	529	933	receptor	30.2.1	signalling.receptor kinases.leucine rich repeat I	kinase | chr2:15568986-15573726 FORWARD	T	30	30.2	plasma membrane	PM
AT1G67720	AT1G67720	receptor kinases	LRR_clade_1	LRR I*	534	929	receptor	30.2.99	signalling.receptor kinases.misc	leucine-rich repeat family protein / protein kinase family protein | chr1:25386341-25391073 FORWARD	T	30	30.2	plasma membrane	PM
AT1G74360	GRACE	receptor kinases	RLCK_10A	LRR X	731	1106	receptor	17.3.2.1	hormone metabolism.brassinosteroid.signal transduction.BRI	leucine-rich repeat transmembrane protein kinase, putative | chr1:27954231-27958114 FORWARD	T	17	17.3	plasma membrane	PM
AT1G56140	AT1G56140	receptor kinases	Unclassified	LRR VIII	633	1033	co-receptor	30.2.8.2	signalling.receptor kinases.leucine rich repeat VIII.VIII-2	leucine-rich repeat family protein / protein kinase family protein | chr1:21001574-21007809 REVERSE	T	30	30.2	plasma membrane	PM
AT1G63430	AT1G63430	receptor kinases	Unclassified	LRR VI	290	664	co-receptor	30.2.6	signalling.receptor kinases.leucine rich repeat VI	leucine-rich repeat transmembrane protein kinase, putative | chr1:23522608-23526770 FORWARD	T	30	30.2	plasma membrane	PM
AT1G68400	AT1G68400	receptor kinases	Unclassified	LRR III	277	670	co-receptor	30.2.3	signalling.receptor kinases.leucine rich repeat III	leucine-rich repeat transmembrane protein kinase, putative | chr1:25646039-25648946 REVERSE	T	30	30.2	plasma membrane	PM
AT4G26540	RGFR3	receptor kinases	Unclassified	LRR XI	701	1091	receptor	30.2.11	signalling.receptor kinases.leucine rich repeat XI	kinase | chr4:13394522-13398112 REVERSE	T	30	30.2	plasma membrane	PM
AT2G25790	SKM1	receptor kinases	Unclassified	LRR IV	635	960	receptor	30.2.4	signalling.receptor kinases.leucine rich repeat IV	leucine-rich repeat transmembrane protein kinase, putative | chr2:11000599-11004235 FORWARD	T	30	30.2	plasma membrane	PM
AT2G27060	AT2G27060	receptor kinases	Unclassified	LRR III	565	1020	receptor	30.2.3	signalling.receptor kinases.leucine rich repeat III	ATP binding / protein binding / protein kinase/ protein serine/threonine kinase/ protein tyrosine kinase | chr2:11551041-11554775 FORWARD	T	30	30.2	plasma membrane	PM
AT5G51350	MOL1	receptor kinases	Unclassified	LRRXIV	590	895	receptor	30.2.14	signalling.receptor kinases.leucine rich repeat XIV	leucine-rich repeat transmembrane protein kinase, putative | chr5:20867602-20870745 REVERSE	T	30	30.2	plasma membrane	PM
AT3G14840	AtLIK1	receptor kinases	LRR_clade_3	LRR VIIIB**	83	112	co-receptor	30.2.8.2	signalling.receptor kinases.leucine rich repeat VIII.VIII-2	leucine-rich repeat family protein / protein kinase family protein | chr3:4988107-4994058 FORWARD	T	30	30.2	plasma membrane	PM
AT3G46420	AT3G46420	receptor kinases	Unclassified	LRR I	480	838	receptor	30.2.1	signalling.receptor kinases.leucine rich repeat I	leucine-rich repeat family protein / protein kinase family protein | chr3:17082108-17086534 FORWARD	T	30	30.2	plasma membrane	PM
AT3G56100	MRLK	receptor kinases	Unclassified	LRR III	317	719	co-receptor	30.2.3	signalling.receptor kinases.leucine rich repeat III	Symbols: MRLK, IMK3 | MRLK (MERISTEMATIC RECEPTOR-LIKE KINASE); ATP binding / protein binding / protein kinase/ protein serine/threonine kinase | chr3:20816931-20819517 REVERSE	T	30	30.2	plasma membrane	PM
AT4G18640	MDIS2/MRH1	receptor kinases	Unclassified	LRR VI	293	662	co-receptor	30.2.6	signalling.receptor kinases.leucine rich repeat VI	Symbols: MRH1 | MRH1 (morphogenesis of root hair 1); ATP binding / protein binding / protein kinase/ protein serine/threonine kinase/ protein tyrosine kinase | chr4:10259678-10263764 FORWARD	T	30	30.2	plasma membrane	PM
AT4G20790	AT4G20790	receptor kinases	Unclassified	LRR VI	176	518	co-receptor	30.2.6	signalling.receptor kinases.leucine rich repeat VI	leucine-rich repeat family protein | chr4:11134775-11136423 REVERSE	T	30	30.2	plasma membrane	PM
AT5G41180	AT5G41180	receptor kinases	Unclassified	LRR VI	249	664	co-receptor	30.2.6	signalling.receptor kinases.leucine rich repeat VI	leucine-rich repeat protein kinase, putative | chr5:16483871-16487426 FORWARD	T	30	30.2	plasma membrane	PM
AT5G45840	MDIS1	receptor kinases	Unclassified	LRR VI	318	692	co-receptor	30.2.6	signalling.receptor kinases.leucine rich repeat VI	leucine-rich repeat transmembrane protein kinase, putative | chr5:18594080-18597221 REVERSE	T	30	30.2	plasma membrane	PM
AT4G20940	GHR1	receptor kinases	Unclassified	LRR VII	608	1143	receptor	30.2.3	signalling.receptor kinases.leucine rich repeat III	leucine-rich repeat family protein | chr4:11202728-11206280 FORWARD	T	30	30.2	plasma membrane	PM
AT1G29730	AT1G29730	receptor kinases	Unclassified	LRR VIIIB**	594	969	receptor	30.2.8.2	signalling.receptor kinases.leucine rich repeat VIII.VIII-2	ATP binding / kinase/ protein binding / protein kinase/ protein serine/threonine kinase/ protein tyrosine kinase | chr1:10400564-10405874 REVERSE	T	30	30.2	plasma membrane	PM
AT3G53590	AT3G53590	receptor kinases	Unclassified	LRR VIIIA	356	783	co-receptor	30.2.8.1	signalling.receptor kinases.leucine rich repeat VIII.VIII-1	leucine-rich repeat transmembrane protein kinase, putative | chr3:19867379-19871651 REVERSE	T	30	30.2	plasma membrane	PM
AT1G09970	RLK7/KUK2	receptor kinases	Unclassified	LRR XI	577	976	receptor	30.2.11	signalling.receptor kinases.leucine rich repeat XI	Symbols: LRR XI-23 | LRR XI-23; ATP binding / kinase/ protein kinase/ protein serine/threonine kinase | chr1:3252317-3255654 FORWARD	T	30	30.2	plasma membrane	PM
AT3G02130	RPK2	receptor kinases	Unclassified	LRR X	772	1151	receptor	30.2.99	signalling.receptor kinases.misc	Symbols: RPK2, TOAD2 | RPK2 (RECEPTOR-LIKE PROTEIN KINASE 2); ATP binding / kinase/ protein serine/threonine kinase | chr3:381219-384442 FORWARD	T	30	30.2	plasma membrane	PM
