# Supplementary material for: Classification and Interactions of LRR Receptors and Co-receptors Within the Arabidopsis Plasma Membrane – An Overview
Source: Front Plant Sci. 2019 Apr 16;10:472. doi: 10.3389/fpls.2019.00472 (PMC6477698; doi:10.3389/fpls.2019.00472)
Supplement: TABLE S2 — Interaction partners for the network construction. [file Table_2.XLSX]

## Sheet: Sheet1
Partner 1	Partner 2	Source	Score	Refernces of Source 'Publication'
AT1G05700	AT4G20790	MIND	1
AT1G05700	AT5G59650	MIND	1
AT1G07550	AT4G20790	MIND	1
AT1G07550	AT5G59650	MIND	1
AT1G07560	AT4G20790	MIND	1
AT1G07560	AT5G59650	MIND	1
AT1G07650	AT4G20790	MIND	1
AT1G07650	AT5G59650	MIND	1
AT1G08590	AT5G59650	MIND	1
AT1G10850	AT3G56370	STRING	0.553
AT1G11130	AT4G20790	MIND	1
AT1G11130	AT3G56370	STRING	0.478
AT1G11130	AT4G36180	STRING	0.421
AT1G11130	AT5G67280	STRING	0.416
AT1G12460	AT3G28040	STRING	0.449
AT1G14390	AT4G20790	MIND	1
AT1G14390	AT5G59650	MIND	1
AT1G17750	AT4G33430	AI	1
AT1G17750	AT1G73080	STRING	0.639
AT1G17750	AT5G20480	STRING	0.413
AT1G27190	AT4G20790	MIND	1
AT1G31420	AT3G49670	STRING	0.417
AT1G34110	AT5G59650	MIND	1
AT1G34110	AT4G20790	MIND	1
AT1G34210	AT2G41820	MIND	1
AT1G34210	AT1G71830	AI	1
AT1G34210	AT1G34210	AI	1
AT1G34210	AT5G48380	STRING	0.803
AT1G34420	AT2G31880	STRING	0.548
AT1G34420	AT5G25930	STRING	0.456
AT1G34420	AT1G74360	STRING	0.444
AT1G34420	AT1G56120	STRING	0.442
AT1G34420	AT1G35710	STRING	0.414
AT1G35710	AT2G31880	STRING	0.673
AT1G35710	AT1G56120	STRING	0.543
AT1G35710	AT5G48380	STRING	0.437
AT1G48480	AT3G28040	MIND	1
AT1G48480	AT3G56370	STRING	0.584
AT1G48480	AT5G16590	STRING	0.484
AT1G48480	AT3G08680	STRING	0.455
AT1G51790	AT1G51800	STRING	0.897
AT1G51790	AT1G51850	STRING	0.704
AT1G51790	AT4G08850	STRING	0.582
AT1G51790	AT1G51890	STRING	0.565
AT1G51790	AT2G19190	STRING	0.556
AT1G51790	AT5G59680	STRING	0.512
AT1G51800	AT1G51850	STRING	0.794
AT1G51800	AT2G19190	STRING	0.705
AT1G51800	AT4G08850	STRING	0.701
AT1G51800	AT1G51890	STRING	0.669
AT1G51800	AT2G31880	STRING	0.505
AT1G51800	AT5G48380	STRING	0.501
AT1G51800	AT1G74360	STRING	0.465
AT1G51800	AT5G25930	STRING	0.458
AT1G51800	AT1G51820	STRING	0.431
AT1G51850	AT2G19190	STRING	0.467
AT1G51850	AT1G51890	STRING	0.443
AT1G51850	AT4G08850	STRING	0.408
AT1G51850	AT1G51860	STRING	0.408
AT1G51860	AT1G51890	STRING	0.503
AT1G51890	AT2G19190	STRING	0.737
AT1G51890	AT1G74360	STRING	0.692
AT1G53430	AT1G53440	STRING	0.716
AT1G53440	AT5G01950	STRING	0.449
AT1G55610	AT1G55610	AI	1
AT1G55610	AT4G33430	AI	1
AT1G55610	AT3G13380	STRING	0.853
AT1G56120	AT2G31880	STRING	0.411
AT1G60630	AT4G20790	MIND	1
AT1G60630	AT5G59650	MIND	1
AT1G60800	AT3G49670	STRING/publication	1	Cui, Y., et al. (2018).Plant Cell. doi: 10.1105/tpc.17.00586.
AT1G60800	AT4G34220	STRING	0.527
AT1G60800	AT5G65700	STRING/publication	1	Cui, Y., et al. (2018).Plant Cell. doi: 10.1105/tpc.17.00586.
AT1G66150	AT3G23750	STRING	0.614
AT1G66150	AT5G16590	STRING	0.44
AT1G71830	AT4G39400	TAIR	1
AT1G71830	AT1G71830	AI	1
AT1G71830	AT4G33430	AI	1
AT1G71830	AT5G48380	STRING	0.808
AT1G71830	AT4G36180	STRING	0.416
AT1G72180	AT5G59650	MIND	1
AT1G72300	AT1G74360	STRING	0.409
AT1G73080	AT4G33430	AI	1
AT1G73080	AT5G25930	STRING	0.525
AT1G73080	AT5G20480	STRING	0.424
AT1G73080	AT1G74360	STRING	0.411
AT1G74360	AT5G25930	STRING	0.919
AT1G74360	AT5G48380	STRING	0.623
AT1G74360	AT3G28450	STRING	0.558
AT1G74360	AT2G31880	STRING	0.554
AT1G74360	AT2G02220	STRING	0.493
AT1G74360	AT5G20480	STRING	0.474
AT1G74360	AT3G13380	STRING	0.464
AT1G74360	AT4G08850	STRING	0.435
AT1G74360	AT4G33430	STRING	0.418
AT1G75820	AT1G75820	AI	1
AT1G75820	AT3G49670	STRING	0.868
AT1G75820	AT5G65700	STRING	0.828
AT1G78980	AT2G04300	STRING	0.455
AT2G01950	AT2G01950	AI	1
AT2G02220	AT5G25930	STRING	0.619
AT2G02220	AT3G28450	STRING	0.457
AT2G02220	AT5G48380	STRING	0.43
AT2G13790	AT5G48380	STRING	0.894
AT2G13790	AT5G20480	STRING	0.876
AT2G13790	AT4G39400	STRING	0.852
AT2G13790	AT5G46330	STRING	0.832
AT2G16250	AT5G53890	MIND	1
AT2G20850	AT2G41820	MIND	1
AT2G24230	AT4G20790	MIND	1
AT2G24230	AT5G59650	MIND	1
AT2G26330	AT5G62230	STRING	0.841
AT2G26330	AT5G07180	STRING	0.454
AT2G26330	AT3G49670	STRING	0.432
AT2G26330	AT5G67280	STRING	0.424
AT2G26730	AT3G56370	STRING	0.719
AT2G26730	AT5G10020	STRING	0.486
AT2G26730	AT5G65700	STRING	0.47
AT2G26730	AT2G35620	STRING	0.453
AT2G26730	AT3G08680	STRING	0.421
AT2G27060	AT4G20790	MIND	1
AT2G28960	AT4G20790	MIND	1
AT2G28960	AT5G59650	MIND	1
AT2G28990	AT4G20790	MIND	1
AT2G28990	AT5G59650	MIND	1
AT2G31880	AT5G48380	STRING	0.939
AT2G31880	AT4G08850	STRING	0.888
AT2G31880	AT5G25930	STRING	0.844
AT2G31880	AT3G28450	STRING	0.542
AT2G35620	AT3G17840	STRING	0.493
AT2G37050	AT5G51560	MIND	1
AT2G37050	AT4G20790	MIND	1
AT2G37050	AT5G59650	MIND	1
AT2G41820	AT4G20790	MIND	1
AT2G41820	AT5G59650	MIND	1
AT2G41820	AT5G51560	STRING	0.414
AT2G45340	AT4G20790	MIND	1
AT2G45340	AT5G59650	MIND	1
AT3G03770	AT4G20790	MIND	1
AT3G08680	AT4G20790	MIND	1
AT3G08680	AT3G56370	STRING	0.796
AT3G08680	AT5G10020	STRING	0.67
AT3G08680	AT5G51560	STRING	0.546
AT3G08680	AT4G23740	STRING	0.512
AT3G08680	AT5G65700	STRING	0.485
AT3G08680	AT5G01890	STRING	0.467
AT3G08680	AT4G36180	STRING	0.456
AT3G08680	AT5G16590	STRING	0.443
AT3G08680	AT3G17840	STRING	0.404
AT3G13380	AT4G33430	STRING	0.849
AT3G14350	AT4G20790	MIND	1
AT3G14350	AT5G59650	MIND	1
AT3G17840	AT3G17840	MIND	1
AT3G17840	AT4G20790	MIND	1
AT3G17840	AT5G59650	MIND	1
AT3G17840	AT3G56370	STRING	0.798
AT3G17840	AT5G65700	STRING	0.482
AT3G17840	AT5G51560	STRING	0.402
AT3G28040	AT4G20790	MIND	1
AT3G28040	AT5G59650	MIND	1
AT3G28040	AT3G49670	STRING	0.732
AT3G28040	AT4G34220	STRING	0.536
AT3G28040	AT3G56370	STRING	0.46
AT3G28040	AT4G36180	STRING	0.42
AT3G28040	AT5G10020	STRING	0.4
AT3G28450	AT5G48380	STRING	0.749
AT3G28450	AT5G25930	STRING	0.596
AT3G28450	AT4G08850	STRING	0.521
AT3G28450	AT4G33430	STRING	0.445
AT3G49670	AT5G65700	STRING	0.781
AT3G49670	AT3G56370	STRING	0.541
AT3G49670	AT4G34220	STRING	0.53
AT3G49670	AT5G16000	STRING	0.507
AT3G49670	AT5G56040	STRING	0.407
AT3G51740	AT4G36180	STRING	0.528
AT3G56370	AT5G51560	STRING	0.819
AT3G56370	AT5G65700	STRING	0.617
AT3G56370	AT4G36180	STRING	0.611
AT3G56370	AT4G23740	STRING	0.526
AT3G56370	AT5G01890	STRING	0.524
AT3G56370	AT5G10020	STRING	0.5
AT3G56370	AT5G67200	STRING	0.49
AT3G56370	AT5G43020	STRING	0.407
AT4G08850	AT5G48380	STRING	0.748
AT4G08850	AT5G25930	STRING	0.572
AT4G08850	AT5G49760	STRING	0.4
AT4G20270	AT5G05160	STRING	0.533
AT4G20790	AT5G56040	MIND	1
AT4G20790	AT4G23740	MIND	1
AT4G20790	AT4G31250	MIND	1
AT4G20790	AT4G34220	MIND	1
AT4G20790	AT4G36180	MIND	1
AT4G20790	AT4G37250	MIND	1
AT4G20790	AT5G06820	MIND	1
AT4G20790	AT5G10020	MIND	1
AT4G20790	AT5G10290	MIND	1
AT4G20790	AT5G16900	MIND	1
AT4G20790	AT5G45780	MIND	1
AT4G20790	AT5G49760	MIND	1
AT4G20790	AT5G58150	MIND	1
AT4G20790	AT5G59670	MIND	1
AT4G20790	AT5G63930	MIND	1
AT4G20790	AT5G63710	MIND	1
AT4G20790	AT5G59650	MIND	1
AT4G20790	AT4G20790	MIND	1
AT4G22130	AT5G59650	MIND	1
AT4G22730	AT5G59650	MIND	1
AT4G23740	AT5G59650	MIND	1
AT4G28490	AT5G65710	STRING	0.531
AT4G31250	AT5G59650	MIND	1
AT4G33430	AT4G39400	TAIR	1
AT4G33430	AT5G46330	BIOGRID	1
AT4G33430	AT5G48380	STRING	0.986
AT4G33430	AT5G20480	STRING	0.966
AT4G34220	AT5G59650	MIND	1
AT4G34220	AT5G16000	STRING	0.416
AT4G36180	AT5G51560	STRING	0.571
AT4G36180	AT5G65700	STRING	0.41
AT4G37250	AT5G59650	MIND	1
AT4G39400	AT4G39400	TAIR	1
AT4G39400	AT5G20480	STRING	0.421
AT4G39400	AT5G46330	STRING	0.411
AT5G07180	AT5G62230	STRING	0.477
AT5G10020	AT5G59650	MIND	1
AT5G10020	AT5G16590	STRING	0.46
AT5G10290	AT5G59650	MIND	1
AT5G16900	AT5G59650	MIND	1
AT5G20480	AT5G46330	STRING	0.45
AT5G20480	AT5G25930	STRING	0.431
AT5G25930	AT5G48380	STRING	0.728
AT5G49660	AT5G63710	STRING	0.42
AT5G49760	AT5G59650	MIND	1
AT5G51560	AT5G65700	STRING	0.414
AT5G58150	AT5G59650	MIND	1
AT5G59650	AT5G59670	MIND	1
AT5G59650	AT5G63710	MIND	1
AT5G59650	AT5G63930	MIND	1
AT1G73080	AT5G63710	Publication	1	Chakraborty, S., et al. (2018). Sci Rep 8(1), 2796. doi: 10.1038/s41598-018-21218-y
AT1G17750	AT5G63710	Publication	1	Chakraborty, S., et al. (2018). Sci Rep 8(1), 2796. doi: 10.1038/s41598-018-21218-y
AT4G33430	AT4G28490	Publication	1	Meng, X., et al. (2016). Cell Rep 14(6), 1330-1338. doi: 10.1016/j.celrep.2016.01.023.
AT4G33430	AT1G28440	Publication	1	Meng, X., et al. (2016). Cell Rep 14(6), 1330-1338. doi: 10.1016/j.celrep.2016.01.023.
AT2G26330	AT4G33430	Publication	1	Jorda, L., et al. (2016). Front Plant Sci 7, 897. doi: 10.3389/fpls.2016.00897.
AT1G51800	AT4G33430	Publication	1	Yeh, Y.H., et al. (2016). Plant Cell 28(7), 1701-1721. doi: 10.1105/tpc.16.00313.
AT1G51800	AT5G46330	Publication	1	Yeh, Y.H., et al. (2016). Plant Cell 28(7), 1701-1721. doi: 10.1105/tpc.16.00313.
AT1G51800	AT5G20480	Publication	1	Yeh, Y.H., et al. (2016). Plant Cell 28(7), 1701-1721. doi: 10.1105/tpc.16.00313.
AT1G71830	AT4G28490	Publication	1	Meng, X., et al. (2016). Cell Rep 14(6), 1330-1338. doi: 10.1016/j.celrep.2016.01.023.
AT1G71830	AT2G02220	Publication	1	Wang, J., et al. (2015). Nature 525(7568), 265-268. doi: 10.1038/nature14858.
AT1G34210	AT2G02220	Publication	1	Wang, J., et al. (2015). Nature 525(7568), 265-268. doi: 10.1038/nature14858.
AT5G07280	AT1G71830	Publication	1	Li, Z., et al. (2017). Plant Physiol 173(1), 326-337. doi: 10.1104/pp.16.01219
AT5G07280	AT1G34210	Publication	1	Li, Z., et al. (2017). Plant Physiol 173(1), 326-337. doi: 10.1104/pp.16.01220
AT2G23950	AT5G65700	Publication	1	Cui, Y., et al. (2018).Plant Cell. doi: 10.1105/tpc.17.00586.
AT4G30520	AT5G65700	Publication	1	Cui, Y., et al. (2018).Plant Cell. doi: 10.1105/tpc.17.00586.
AT5G45780	AT5G65700	Publication	1	Cui, Y., et al. (2018).Plant Cell. doi: 10.1105/tpc.17.00586.
AT2G23950	AT3G49670	Publication	1	Cui, Y., et al. (2018).Plant Cell. doi: 10.1105/tpc.17.00586.
AT4G30520	AT3G49670	Publication	1	Cui, Y., et al. (2018).Plant Cell. doi: 10.1105/tpc.17.00586.
AT5G45780	AT3G49670	Publication	1	Cui, Y., et al. (2018).Plant Cell. doi: 10.1105/tpc.17.00586.
AT1G60800	AT3G02130	Publication	1	Hu, C., et al. (2018). Nat Plants 4(4), 205-211. doi: 10.1038/s41477-018-0123-z.
AT2G23950	AT3G02130	Publication	1	Cui, Y., et al. (2018).Plant Cell. doi: 10.1105/tpc.17.00586.
AT4G30520	AT3G02130	Publication	1	Hu, C., et al. (2018). Nat Plants 4(4), 205-211. doi: 10.1038/s41477-018-0123-z.
AT5G45780	AT3G02130	Publication	1	Cui, Y., et al. (2018).Plant Cell. doi: 10.1105/tpc.17.00586.
AT1G60800	AT1G75820	Publication	1	Hu, C., et al. (2018). Nat Plants 4(4), 205-211. doi: 10.1038/s41477-018-0123-z.
AT4G30520	AT1G75820	Publication	1	Hu, C., et al. (2018). Nat Plants 4(4), 205-211. doi: 10.1038/s41477-018-0123-z.
AT1G71830	AT5G61480	Publication	1	Zhang, H., (2016).Mol Plant 9(10), 1406-1414. doi: 10.1016/j.molp.2016.07.004.
AT1G34210	AT5G61480	Publication	1	Zhang, H., (2016).Mol Plant 9(10), 1406-1414. doi: 10.1016/j.molp.2016.07.004.
AT5G45840	AT4G28650	Publication	1	Wang, T., et al. (2016). Nature 531(7593), 241-244. doi: 10.1038/nature16975.
AT5G45840	AT4G08850	Publication	1	Wang, T., et al. (2016). Nature 531(7593), 241-244. doi: 10.1038/nature16975.
AT1G51830	AT4G33430	Publication	1	Yuan, N., et al. (2018). Plant Physiol 176(4), 3062-3080. doi: 10.1104/pp.17.01266.
AT1G51820	AT4G33430	Publication	1	Yuan, N., et al. (2018). Plant Physiol 176(4), 3062-3080. doi: 10.1104/pp.17.01266.
AT1G51850	AT4G33430	Publication	1	Yuan, N., et al. (2018). Plant Physiol 176(4), 3062-3080. doi: 10.1104/pp.17.01266.
AT1G51805	AT4G33430	Publication	1	Yuan, N., et al. (2018). Plant Physiol 176(4), 3062-3080. doi: 10.1104/pp.17.01266.
